# Supplementary material for: Host population structure impedes reversion to drug sensitivity after discontinuation of treatment
Source: PubMed Central journal article supplement (PMC5602665; doi:10.1371/journal.pcbi.1005704), 2017-08-21

● 50% resistant

\* 10% resistant

variance: 0 1 2 4 6 10 16 24

gradual  0 1 2 4 6 10 16 24

immediate  0 1 2 4 6 10 16 24

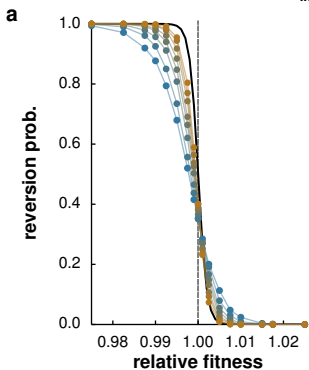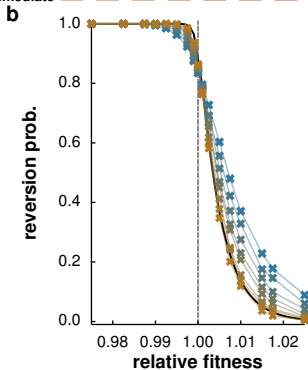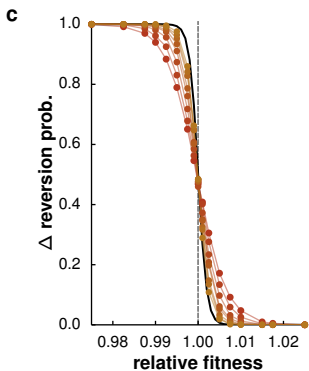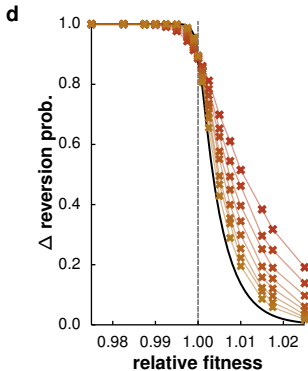

Supplement: pcbi.1005704.s001.pdf [file pcbi.1005704.s001.pdf]
