# Supplementary material for: Host population structure impedes reversion to drug sensitivity after discontinuation of treatment
Source: PubMed Central journal article supplement (PMC5602665; doi:10.1371/journal.pcbi.1005704), 2017-08-21

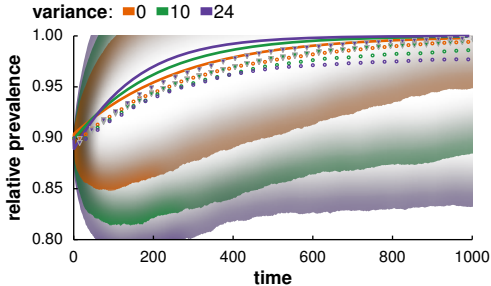

Supplement: pcbi.1005704.s003.pdf [file pcbi.1005704.s003.pdf]
